## **No change in 24-hour salt intake estimated from spot urine in Norwegian adults from 2006 to 2019. The population-based HUNT Study**

Kristin Holvik<sup>1\*</sup>, Marianne Hope Abel<sup>1</sup>, Jostein Holmen<sup>2</sup>, Steinar Krokstad<sup>2,3</sup>,  
Torunn Holm Totland<sup>1</sup>, Haakon E Meyer<sup>1,4</sup>

<sup>1</sup> Department of Physical Health and Ageing, Norwegian Institute of Public Health, Oslo, Norway

<sup>2</sup> HUNT Research Center, Department of Public Health and Nursing, Norwegian University of Science and Technology (NTNU), Trondheim, Norway

<sup>3</sup> Levanger Hospital, Nord-Trøndelag Hospital Trust, Levanger, Norway

<sup>4</sup> Department of Community Medicine and Global Health, Institute of Health and Society, University of Oslo, Norway

\* **Corresponding author:** Kristin Holvik, Department of Physical Health and Ageing, Norwegian Institute of Public Health, P. O. Box 222 Skøyen, 0213 Oslo, Norway. [kristin.holvik@fhi.no](mailto:kristin.holvik@fhi.no).

**Short title:** Salt intake in Norwegian adults

**Acknowledgements:** The Trøndelag Health Study (HUNT) is a collaboration between HUNT Research Centre (Faculty of Medicine and Health Sciences, Norwegian University of Science and Technology NTNU), Trøndelag County Council, Central Norway Regional Health Authority, and the Norwegian Institute of Public Health.

**Financial Support:** This study received no external funding.

**Conflict of Interest:** None

**Authorship:** HEM conceived the idea of this study. JH and SK planned and organized the HUNT data collections. HEM carried out the data analysis and prepared tables. KH drafted the manuscript. KH, MHA, JH, SK, THT and HEM contributed to interpretation of data and critical revision for important intellectual content. All authors read and approved the final version of the manuscript.

**Ethical Standards Disclosure:** This study was conducted according to the guidelines laid down in the Declaration of Helsinki and all procedures involving research study participants were approved by the Regional Committee for Medical Research Ethics Mid-Norway (REK midt 20339). Written informed consent was obtained from all participants.

## **Abstract**

*Objective:* Monitoring time trends in salt consumption is important for evaluating the impact of salt reduction initiatives on public health outcomes. There has so far not been available data to indicate if salt consumption in Norway has changed during the previous decade. We aimed to assess whether average 24-hour salt intake estimated from spot urine samples in the adult population of mid-Norway changed from 2006-08 to 2017-19, and to describe variations by sex, age, and educational level.

*Design:* Repeated cross-sectional studies.

*Setting:* The population-based HUNT Study.

*Participants:* In each of two consecutive waves (HUNT3: 2006-08 and HUNT4: 2017-19), spot urine samples were collected from 500 men and women aged 25-64 years, in addition to 250 men and women aged 70-79 years in HUNT4. Based on spot urine concentrations of sodium, potassium and creatinine, age, sex, and body mass index, we estimated 24-hour sodium intake using the INTERSALT equation for the Northern European region.

*Results:* Mean (95% confidence interval (CI)) estimated 24-hour salt intakes in men were 11.1 (95% CI 10.8, 11.3) g in HUNT3 and 10.9 (95% CI 10.6, 11.1) g in HUNT4,  $p=0.25$ .

Corresponding values in women were 7.7 (95% CI 7.5, 7.9) g and 7.7 (95% CI 7.5, 7.9) g,  $p=0.88$ .

Mean estimated salt intake in HUNT4 decreased with increasing age in women, but not in men, and it did not differ significantly across educational level in either sex.

*Conclusions:* Estimated 24-hour salt intake in adult men and women in mid-Norway did not change from 2006-08 to 2017-19.

**Keywords:** Salt intake, sodium, potassium, spot urine samples, population-based study, Norway

## 1 **Introduction**

2 Excess sodium consumption is linked to hypertension and risk of cardiovascular disease (CVD),  
3 and a shift towards a lower sodium to potassium ratio (Na/K ratio) in the diet has shown improved  
4 outcomes in terms of lowering blood pressure and reducing cardiovascular morbidity and mortality  
5 <sup>(1-6)</sup>. A global initiative to reduce dietary salt intake for improving cardiovascular health is  
6 coordinated by the World Health Organization (WHO) <sup>(7)</sup>. In all member states of the WHO  
7 European Region where sodium intakes have been assessed by urine collections, average intakes  
8 clearly exceed the recommended maximum level of 2 g/day for adults, corresponding to  
9 approximately 5 g salt <sup>(8-10)</sup>. Several countries, including Norway, have committed to reduce  
10 population salt intakes by 30% between 2010 and 2025 <sup>(7, 11)</sup>. Strategies to achieve this goal involve  
11 reductions of salt content in processed foods and increasing consumers' awareness through  
12 information and food labelling. National policies that involve structural interventions have a  
13 potential for reducing population salt intake <sup>(12)</sup>. The interventions should be implemented gradually  
14 to allow for adapting to the less salty taste of foods, thus preventing consumers from shifting to  
15 saltier products or compensating by adding more salt during preparation and consumption. As in  
16 several countries, there has been progress in Norway <sup>(13)</sup> with reduced salt content in common foods  
17 through a commitment between food industry and the government <sup>(14)</sup>. Monitoring time trends in  
18 salt consumption is necessary for evaluating the public health impact of these initiatives. In the  
19 large population-based HUNT Study in mid-Norway, systolic blood pressure declined sharply from  
20 the mid-1990s to the mid-2000s <sup>(15)</sup> and thereafter there was a continued slight decline until 2017-  
21 2019 <sup>(16, 17)</sup>. There has so far not been available data to indicate if population salt consumption has  
22 changed during the last decade.

23

24 Approximately 90% of ingested sodium is excreted through the urine, and measurements of 24-hour  
25 urinary sodium excretion in representative samples is recommended as an indicator of average  
26 population sodium intake <sup>(10, 18)</sup>. However, collecting 24-hour urine is resource-demanding and  
27 collection of spot urine samples may often be more feasible. Therefore, equations for predicting 24-  
28 hour excretion from spot urine concentrations have been developed in different populations <sup>(19-22)</sup>. A  
29 meta-analysis of validation studies concluded that the mean population 24-hour salt intake can be  
30 predicted fairly accurately from spot urine samples collected in the same population <sup>(23)</sup>. In a  
31 population-based study in Northern Norway, excretion of sodium, potassium and creatinine was  
32 measured in both 24-hour urine and spot urine <sup>(24)</sup>. Among three previously developed equations for  
33 estimating salt intake from spot urine concentrations, the equation developed in the International  
34 Cooperative Study on Salt and Blood Pressure (INTERSALT) study with the coefficient for the

35 Northern European region<sup>(20, 25)</sup> yielded the most accurate estimate of average 24-hour sodium  
36 excretion and thus represents the preferred choice in an adult Norwegian population<sup>(24)</sup>.

37

38 Urinary sodium, potassium, and creatinine concentrations were available from spot urine samples of  
39 participants in two waves of a large population-based health study in mid-Norway in 2006-08  
40 (n=500 aged 25-64 years) and 2017-19 (n=500 aged 25-64 and n=250 aged 70-79 years).

41 Participant sampling, urine collection and biochemical analyses were performed using identical  
42 methods in both waves<sup>(17)</sup>. We aimed to assess whether there has been a change in salt intake  
43 during the period, and to assess possible variations in urinary concentrations of sodium, potassium,  
44 Na/K ratio, and estimated salt intake across sex, age, and educational level.

45

## 46 **Methods**

### 47 *Study population*

48 The HUNT Study is a population-based cohort study of the adult population in Trøndelag County in  
49 mid-Norway, a region characterized by a relatively homogenous ethnic population and low  
50 migration, suitable for examining time trends<sup>(17)</sup>. The study has been running in Nord-Trøndelag  
51 since 1984, inviting all inhabitants aged 20 years and older to participate. The data collection covers  
52 a wide range of health-related topics through repeated surveys with questionnaires, interviews,  
53 clinical examinations, laboratory measurements and stored biological samples. The third wave  
54 (HUNT3) was carried out in 2006-08 and the fourth wave (HUNT4) was carried out in 2017-19.

55 Overall participation rate, defined as completing the main questionnaire and attending the clinical  
56 screening<sup>(26)</sup>, was the same in these two waves; 54% (49% in men and 59% in women). Spot urine  
57 samples were collected from approximately 12000 participants in HUNT3 and 26900 participants in  
58 HUNT4. For our purpose, age- and sex-stratified subsets of 500 HUNT3 participants and 750  
59 HUNT4 participants were drawn randomly from participants who had donated a spot urine sample  
60 and had no known kidney disease, heart failure or cerebral stroke. These comprised 125 individuals  
61 of each sex in each of the age strata 25-44 years and 45-64 years in both waves, and an additional  
62 125 individuals of each sex aged 70-79 years who attended the HUNT 70+ extension of HUNT4.

63

### 64 *Biochemical analyses*

65 In both waves, spot urine samples were non-fasting and taken any time during the day (9am to  
66 8pm). The samples were immediately cooled down to 4°C, transported at 4°C to HUNT Biobank  
67 the same day and frozen to -80°C the following day for storage. The analyses were performed at  
68 Levanger Hospital with Architect ci8200. Urinary sodium and potassium were assessed with an

69 indirect ion-selective electrode to determine ion concentration. Urinary creatinine was assessed  
70 using an enzymatic assay. Measurement range was 220 - 35360  $\mu\text{mol/L}$ . Total assay Coefficients of  
71 Variability (CV) was 24% (5790  $\mu\text{mol/L}$ ).

72

### 73 ***Covariates***

74 Height was measured to the nearest centimetre and weight was measured to the nearest half-  
75 kilogram without shoes and wearing light clothing. Body mass index (BMI) was calculated as body  
76 weight in kilograms divided by the squared value of body height in meters ( $\text{kg/m}^2$ ). In HUNT4,  
77 self-reported educational attainment was collected through a questionnaire asking for the highest  
78 completed education, with six response options ranging from primary school to college/university  
79 education of  $\geq 4$  years, based on the Norwegian Standard Classification of Education <sup>(27)</sup>. Response  
80 options 1 and 2 and response options 3 and 4 were combined, resulting in four categories: Primary  
81 education (completed primary school or 1-2 years of high school/vocational school), secondary  
82 education (completed high school or certificate of apprenticeship), university or other post-  
83 secondary education  $< 4$  years, and university/college education of  $\geq 4$  years. For studying  
84 differences by age, individual age was categorized into 25-44 years, 45-64 years, and 70-79 years.

85

### 86 ***24-hour salt intake***

87 Urinary concentrations of sodium, potassium, and creatinine were determined in  $\text{mmol/l}$ . Na/K ratio  
88 was defined as urinary sodium concentration ( $\text{mmol/l}$ ) divided by urinary potassium concentration  
89 ( $\text{mmol/l}$ ). The INTERSALT equation with coefficients for the Northern European region <sup>(20)</sup> was  
90 used to estimate 24-hour sodium excretion. This equation has been validated and found to perform  
91 well in the age range 40-69 years in a population-based study carried out in a geographically close  
92 Norwegian city with a comparable population to that in HUNT in terms of a homogenous ethnic  
93 background <sup>(24)</sup>. The equation is shown in Supplementary Figure 1. It is separate for men and  
94 women and includes age (years), BMI ( $\text{kg/m}^2$ ), and spot urine concentrations of sodium, potassium  
95 and creatinine ( $\text{mmol/l}$ ). To convert from  $\text{mmol}$  to  $\text{g Na/24h}$ , results were multiplied by a factor of  
96 0.023, then multiplied by a factor of 2.54 to obtain  $\text{NaCl (g/24h)}$ .

97

### 98 ***Statistical analysis***

99 Statistical analysis was performed in Stata SE version 17.0 (Stata Corp., College Station, TX). All  
100 analyses were performed in the age groups represented in both waves (25-44 and 45-64 years).  
101 Participants aged 70-79 years were included only when describing mean values by age in HUNT4.  
102 Differences in mean values between HUNT3 and HUNT4 were tested with two-sided T-test. We  
103 performed linear regression and used the *margins* command to estimate mean values with standard

104 deviations and 95% confidence intervals (CI) within groups of sex, age, and education level. Mean  
105 estimated salt intakes (g/24h) by educational level were age-standardized by including individual  
106 age as a covariate in the regression model and stratified by sex. Differences between age groups  
107 were tested by analysis of variance (ANOVA), while differences between groups of educational  
108 level were tested by analysis of covariance (ANCOVA) taking age into account. For results  
109 presented as supplementary material, median values by sex, age, and educational level were  
110 obtained by performing quantile regression followed by the *margins* command in Stata.

111

## 112 **Results**

### 113 *Characteristics of the study population*

114 We included 499 HUNT3 participants and 500 HUNT4 participants aged 25-64 years, and an  
115 additional 250 participants aged 70-79 years in HUNT4. Mean characteristics in the age span  
116 represented in both waves (25-64 years) are shown in Table 1. The corresponding median values are  
117 shown in Supplementary Table 1. Mean age was 46 years in both waves as a result of the age-  
118 stratified sampling (Table 1). BMI in men 25-64 years old was similar in HUNT4 as in HUNT3:  
119 mean 27.6 vs. 27.8 kg/m<sup>2</sup>, p=0.55. In women 25-64 years old, BMI tended to be slightly higher in  
120 HUNT4, mean 26.7 vs. 25.9 kg/m<sup>2</sup> in HUNT3, p=0.09.

121

### 122 *Sodium, potassium, and Na/K ratio in HUNT3 and HUNT4*

123 Mean urinary sodium concentrations in adults aged 25-64 years were not significantly different in  
124 HUNT3 and HUNT4 (Table 1). In men, urinary potassium concentrations tended to be slightly  
125 higher in HUNT4 compared with HUNT3: mean 74 vs. 68 mmol/l (p=0.054). The difference in  
126 urinary potassium in women was small and not statistically significant, mean 63 vs. 59 mmol/l  
127 (p=0.24). Urinary Na/K ratio tended to be slightly lower in HUNT4 than in HUNT3 but the  
128 difference was not statistically significant: Mean 1.92 vs. 2.08 in men (p=0.13) and 1.77 vs. 1.83 in  
129 women (p=0.53) (Table 1). Median values showed a similar pattern (Supplementary Table 1).

130

### 131 *Estimated salt intake in HUNT3 and HUNT4*

132 Among adults aged 25-64 years, mean estimated 24-hour salt intake in HUNT3 was 11.1 g (95% CI  
133 10.8 g, 11.3 g) in men and 7.7 g (95% CI 7.5 g, 7.9 g) in women (Table 1). In HUNT4, the  
134 corresponding values were 10.9 (95% CI 10.6, 11.1) g and 7.7 (95% CI 7.5, 7.9) g, representing no  
135 change from HUNT3 to HUNT4. Results were similar for median values (Supplementary Table 1).  
136 In men and women combined (not shown in table), mean estimated salt intake was 9.37 g in  
137 HUNT3 and 9.28 g in HUNT4 (p=0.52), i.e., a difference of -0.09 g (95% CI -0.38 g, 0.20 g). Age  
138 and sex adjustment did not affect the result.

### 139 *Variations across sex, age, and educational level*

140 Gradients across age and educational level are described for HUNT4 only. Overall and within  
141 categories of age and education, women had a lower estimated 24-hour salt intake than men. In  
142 women there was a clear age gradient, with mean estimated salt intake being highest in younger  
143 adults (8.1 g) and lowest in the 70-79-year-old women (5.9 g,  $p < 0.001$ ) (Table 2). In men, estimated  
144 24-hour salt intake was similar across age (mean 10.7 g for ages 25-44, 11.0 g for ages 40-64, and  
145 11.1 g for ages 70-79,  $p = 0.24$  in ANOVA). While urinary potassium concentrations were similar  
146 across age groups (Table 2), there was an age gradient in urinary sodium concentrations in both  
147 men and women, with the highest concentrations in the younger adults. Consequently, urinary Na/K  
148 ratio was higher in those aged 25-44 years, with a ratio above 2 in both men and women. In age  
149 groups  $\geq 45$  years, Na/K ratio was approximately 1.7 in men and below 1.6 in women (Table 2). In  
150 participants aged 25-64 years, 23% had completed college/university education of at least 4 years,  
151 26% had completed college/university education of less than 4 years, 36% had completed secondary  
152 school, and 15% reported primary school as their highest completed education. Age-standardized  
153 mean estimated 24-hour salt intake did not differ significantly across educational attainment (Table  
154 3). The corresponding median values are shown in Supplementary Tables 2 and 3.

155

### 156 **Discussion**

157 When estimating 24-hour salt intake from spot urine samples using the INTERSALT equation, we  
158 found that salt intake in adult men and women in mid-Norway did not change significantly from  
159 2006-08 to 2017-19. We observed an overall difference in estimated salt intake of -0.09 g between  
160 the two time points, with 95% CI ranging from -0.38 to 0.20 g. The results suggest that salt  
161 consumption did not decrease in adults in mid-Norway during this period. There was a slight  
162 decline in blood pressure levels in this population during the same period <sup>(16, 17)</sup>, suggesting that  
163 blood pressure may have been affected by changes in other risk factors. The magnitude of 24-hour  
164 salt intake was comparable to that in adults aged 40-69 years in the population-based Tromsø Study  
165 in 2015-16 (10.4 g in men and 7.6 g in women) <sup>(24)</sup>.

166

### 167 *Estimating 24-hour salt intake from spot urine samples*

168 For monitoring average sodium intake in populations, 24-hour urinary assessment is the  
169 recommended method <sup>(18)</sup>. Dietary assessment methods have shown large measurement errors due  
170 to reporting errors, highly variable sodium content of food products which challenges food  
171 composition databases, and the difficulty to capture the amount of salt added during preparation and  
172 consumption <sup>(28-30)</sup>. Spot urine samples are often available in large population-based studies, and  
173 equations to estimate 24-hour salt excretion have been developed <sup>(19-22)</sup>.



174

175 In the population-based Tromsø Study 2015-16, both 24-hour urine excretion and spot urine  
176 concentrations of sodium, potassium and creatinine were measured in 475 men and women aged  
177 40-69 years<sup>(24)</sup>. Among three previously developed equations for estimating average 24-hour  
178 sodium intake from spot urine concentrations<sup>(19, 20, 22)</sup>, the INTERSALT equation with the  
179 coefficients for the Northern European region yielded the most accurate estimate<sup>(20, 24)</sup>. The mean  
180 24-hour sodium excretion estimated by the INTERSALT equation was 4% higher in men and 1%  
181 lower in women than that measured by 24-hour urine, corresponding to an overestimation of 0.4 g  
182 salt in men and an underestimation of 0.1 g salt in women<sup>(24)</sup>. The similarity of our findings in the  
183 HUNT population to those of the Tromsø population supports the generalizability of our results in  
184 adults aged <70 years. A previous validation study in a US population aged 18-39 years also found  
185 the INTERSALT equation to perform well among several equations examined<sup>(31)</sup>, but its validity is  
186 not clarified in older adults<sup>(32)</sup>. Furthermore, the INTERSALT equation tends to underestimate 24-  
187 hour NaCl at high intakes and overestimate NaCl at low intakes<sup>(20)</sup>, with the inherent risk of failing  
188 to detect a true decline. However, reassuringly, we observed that sodium concentrations in spot  
189 urine were also unchanged and showed in general the same pattern across subgroups of sex, age,  
190 education, and study wave, supporting a true null finding.

191

### 192 ***Variations by age***

193 There was a clear age gradient in both men and women in 2017-19, with higher urinary sodium  
194 concentrations in the youngest participants. Estimated salt intake was lowest in the oldest women,  
195 while in men there was no significant difference by age. This is in line with findings from the  
196 Tromsø study where calculated salt intake based on 24-hour urine collection was inversely related  
197 to age in women but not in men<sup>(24)</sup>. We may speculate that the finding of higher salt intakes in  
198 younger compared with older women may reflect a more frequent consumption of processed foods,  
199 take-away and readymade foods with a higher salt content in the younger age groups, at the expense  
200 of home-made food prepared from raw ingredients<sup>(33)</sup>. Furthermore, salt intake may be lower in  
201 older women both due to a lower energy intake and a greater attention to sources of salt. Notably, a  
202 nationwide online public health survey conducted in people aged 18 years and older in Norway in  
203 2020<sup>(34)</sup> showed an age gradient in the proportion who reported to add additional salt “often or  
204 usually” to food during preparation and serving, with higher proportions in younger adults. While  
205 the proportion was up to 30 percent in the younger age groups (up to 54 years), it was lower in  
206 those 55 years and older, and lowest in women aged >75 years (11%). In addition, the proportion  
207 who reported frequent consumption of potato chips and salty snacks was highest in younger age



208 groups (18-49 years). Younger age was a stronger predictor than geography and education for both  
209 salt added to meals and frequency of salty snacks consumption <sup>(34)</sup>.

210

### 211 *Urinary Na/K ratio*

212 Mean urinary Na/K ratio in people aged 25-64 years in 2017-19 was approximately 1.9 in men and  
213 1.8 in women. Urinary Na/K ratio was highest (above 2) in younger adults. This difference reflected  
214 the age difference in sodium concentrations, while potassium concentrations did not exhibit a trend  
215 across age. Na/K ratio can be lowered both by lowering sodium through salt reduction and by  
216 increasing potassium, e.g., through increased fruit and vegetable consumption, and is proposed to be  
217 the most relevant measure in relation to blood pressure and CVD risk <sup>(35)</sup>. While there is no  
218 officially recommended target value for Na/K ratio, meeting the dietary target intake of sodium  
219 would result in a ratio of approximately 1 <sup>(36-38)</sup>. Maintaining Na/K ratios below 2 may represent an  
220 intermediary target expected to contribute to reducing blood pressure and CVD risk <sup>(35, 39)</sup>.

221

### 222 *Salt reduction and health outcomes*

223 A modest reduction in salt intake causes a reduction in blood pressure in both hypertensive and  
224 normotensive individuals, with clear public health relevance <sup>(2, 5)</sup>. There is also emerging evidence  
225 that salt reduction and increased use of potassium-based salt substitutes may decrease  
226 cardiovascular morbidity and mortality <sup>(1, 4)</sup>. Addition of salt in meal preparation and consumption  
227 on the household and individual level is highly variable, and existing evidence is underpowered to  
228 support individual dietary advice on salt reduction to achieve clinical benefits in terms of CVD and  
229 mortality <sup>(40)</sup>. However, pre-processed foods contribute a large proportion of total salt intake and  
230 there is a large potential for improving health outcomes through national structural interventions for  
231 salt reduction <sup>(12)</sup>.

232

### 233 *Ongoing action for salt reduction*

234 As part of Norway's commitment to the global initiative to reduce morbidity and mortality of non-  
235 communicable diseases <sup>(11)</sup>, an action plan for salt reduction was introduced in 2014 <sup>(41)</sup>, aiming for  
236 a reduced population salt intake towards a target of 2.3 g sodium (5.75 g salt) per day <sup>(42)</sup>. Initiatives  
237 include increasing public awareness through communication campaigns, nutrition labelling,  
238 monitoring and an intention agreement for salt reduction <sup>(43)</sup>. The intention agreement on facilitating  
239 a healthier diet was signed in 2016 by food industry sectors and the Minister of Health and Care  
240 services, thus committing the parties to continue to work towards reducing salt consumption.  
241 Between 2014 and 2018 average salt content was successfully reduced in many breads and cereals,  
242 while it remained mainly unchanged in most meat and fish products. Overall, 49% of selected food

243 products had a salt content within target levels in 2018, compared with 36% in 2014-15<sup>(14)</sup>. Hence,  
244 the changes were moderate, and we may also speculate that a shift towards a higher consumption of  
245 pre-processed foods might have counteracted the potential benefits of salt reduction of individual  
246 foods. Continuous effort by the food industry and catering services has the potential to make a large  
247 contribution to reduced population salt intake.

248

### 249 *Strengths and limitations*

250 To our knowledge, this is the first population-based study to examine time trends in estimated salt  
251 intake in Norway based on urinary sodium concentrations. The HUNT Study invited all inhabitants  
252 in the former Nord-Trøndelag County region and had a reasonably high participation of 54%<sup>(26)</sup>.  
253 The study covered only one region in Norway. However, the population is considered to be fairly  
254 representative of Norway except for the lack of large cities and immigrant populations<sup>(17)</sup>. Data  
255 from HUNT used in the international research collaboration *NCD-RisC* show that the population  
256 also follows global health trends<sup>(44)</sup>. The participant sampling, urine collection and biochemical  
257 analyses were performed using identical methods in both waves. Another strength is that we had  
258 recently validated the INTERSALT equation and found it to perform well in a Norwegian adult  
259 population<sup>(24)</sup>, and the findings in HUNT were comparable to those of that study. Our study had  
260 statistical power to detect a reduction in 24-hour salt intake of approximately 0.3 grams or larger.  
261 Electrolyte concentrations in a single spot urine sample is an inferior, but more feasible, method for  
262 assessing salt intake in populations, as compared to the total sodium excretion measured in 24-hour  
263 urine collections. It is thus appropriate for epidemiologic studies aiming at a high participation rate  
264 and representativeness. Using spot urine results is reasonable if 24-hour urine samples have been  
265 collected from the same population, to achieve the most accurate prediction of 24-hour salt from  
266 spot urine<sup>(20, 23)</sup>. However, studies have suggested a poorer performance of the INTERSALT  
267 equation in older adults<sup>(32)</sup>. Inferences concerning salt consumption in the oldest HUNT4  
268 participants should therefore be drawn with caution. Another limitation of the INTERSALT  
269 equation is that it tends to underestimate 24-hour salt at higher intakes and overestimate at lower  
270 intakes, with the risk of failing to detect a true decline. However, the unchanged spot urinary  
271 sodium concentrations over the period supported our null finding.

272

273 In conclusion, we observed no change in estimated 24-hour salt intake in adult men and women in  
274 mid-Norway from 2006-08 to 2017-19. Estimated 24-hour salt intakes were lower in women than in  
275 men. There was a clear age gradient in women, with the highest mean estimated salt intake in  
276 younger adults, but we observed no statistically significant educational gradient in salt intake.

## 277 **References**

278

- 279 1. Newberry SJ, Chung M, Anderson CAM *et al.* (2018) *Sodium and Potassium Intake: Effects on*  
280 *Chronic Disease Outcomes and Risks*. Rockville: Agency for Healthcare Research and Quality.
- 281 2. Aburto NJ, Ziolkovska A, Hooper L *et al.* (2013) Effect of lower sodium intake on health:  
282 systematic review and meta-analyses. *BMJ* **346**, f1326.
- 283 3. Aburto NJ, Hanson S, Gutierrez H *et al.* (2013) Effect of increased potassium intake on  
284 cardiovascular risk factors and disease: systematic review and meta-analyses. *BMJ* **346**, f1378.
- 285 4. Neal B, Wu Y, Feng X *et al.* (2021) Effect of Salt Substitution on Cardiovascular Events and Death.  
286 *N Engl J Med* **385**, 1067-1077.
- 287 5. He FJ, Li J Macgregor GA (2013) Effect of longer term modest salt reduction on blood pressure:  
288 Cochrane systematic review and meta-analysis of randomised trials. *BMJ* **346**, f1325.
- 289 6. Brand A, Visser ME, Schoonees A *et al.* (2022) Replacing salt with low-sodium salt substitutes  
290 (LSSS) for cardiovascular health in adults, children and pregnant women. *Cochrane Database Syst*  
291 *Rev* **8**, Cd015207.
- 292 7. World Health Organization (2013) *Global Action Plan for the Prevention and Control of*  
293 *noncommunicable diseases*. Geneva: World Health Organization.
- 294 8. EFSA Panel on Nutrition NFAFAN (2019) Dietary reference values for sodium. Scientific opinion  
295 from the EFSA Panel on Nutrition, Novel Foods and Food Allergens (NDA). *EFSA J* **17**, 1-191.
- 296 9. World Health Organization (2012) *Guideline: Sodium intake for adults and children*. Geneva: World  
297 Health Organization.
- 298 10. Kwong EJJ, Whiting S, Bunge AC *et al.* (2022) Population level salt intake in the WHO European  
299 Region in 2022: a systematic review. *Public Health Nutr*. Published online: 20 October 2022. doi:  
300 10.1017/S136898002200218X.
- 301 11. Norwegian Institute of Public Health (2014) *Global action plan for the prevention and control of*  
302 *non-communicable diseases - Indicators for trends in Norway*. Oslo: Norwegian Institute of Public  
303 Health.
- 304 12. Barberio AM, Sumar N, Trieu K *et al.* (2017) Population-level interventions in government  
305 jurisdictions for dietary sodium reduction: a Cochrane Review. *Int J Epidemiol* **46**, 1551-1405.
- 306 13. World Health Organization (2017) *Meeting of the WHO Action Network on Salt Reduction in the*  
307 *Population in the European Region (ESAN)*. Copenhagen: WHO Regional Office for Europe.
- 308 14. Institute of Marine Research, Norwegian Directorate of Health, Norwegian Food Safety Authority  
309 (2019) *Analysis of salt content in selected Norwegian foods 2014-2018*. Bergen: Institute of Marine  
310 Research.
- 311 15. Holmen J, Holmen TL, Tverdal A *et al.* (2016) Blood pressure changes during 22-year of follow-up  
312 in large general population - the HUNT Study, Norway. *BMC Cardiovasc Disord* **16**, 94.
- 313 16. Norwegian Institute of Public Health, The HUNT Study, The Tromsø Study (2021) Indicators for  
314 non-communicable diseases (NCD): Blood pressure level (Indicator 11).  
315 <https://www.fhi.no/en/op/Indicators-for-NCD/blood-pressure/blodtrykksniva-indikator-11/> (accessed  
316 August 2023).
- 317 17. Åsvold BO, Langhammer A, Rehn TA *et al.* (2023) Cohort Profile Update: The HUNT Study,  
318 Norway. *Int J Epidemiol* **52**, e80-e91.
- 319 18. World Health Organization (2018) *How to obtain measures of population-level sodium intake in 24-*  
320 *hour urine samples*. Cairo: WHO Regional Office for the Eastern Mediterranean.
- 321 19. Toft U, Cerqueira C, Andreassen AH *et al.* (2014) Estimating salt intake in a Caucasian population:  
322 can spot urine substitute 24-hour urine samples? *Eur J Prev Cardiol* **21**, 1300-1307.
- 323 20. Brown IJ, Dyer AR, Chan Q *et al.* (2013) Estimating 24-hour urinary sodium excretion from casual  
324 urinary sodium concentrations in Western populations: the INTERSALT study. *Am J Epidemiol* **177**,  
325 1180-1192.
- 326 21. Kawasaki T, Itoh K, Uezono K *et al.* (1993) A simple method for estimating 24 h urinary sodium  
327 and potassium excretion from second morning voiding urine specimen in adults. *Clin Exp*  
328 *Pharmacol Physiol* **20**, 7-14.
- 329 22. Tanaka T, Okamura T, Miura K *et al.* (2002) A simple method to estimate populational 24-h urinary  
330 sodium and potassium excretion using a casual urine specimen. *J Hum Hypertens* **16**, 97-103.

- 331 23. Huang L, Crino M, Wu JH *et al.* (2016) Mean population salt intake estimated from 24-h urine  
332 samples and spot urine samples: a systematic review and meta-analysis. *Int J Epidemiol* **45**, 239-250.
- 333 24. Meyer HE, Johansson L, Eggen AE *et al.* (2019) Sodium and Potassium Intake Assessed by Spot  
334 and 24-h Urine in the Population-Based Tromsø Study 2015-2016. *Nutrients* **11**, 1619.
- 335 25. Stamler J (1997) The INTERSALT Study: background, methods, findings, and implications. *Am J*  
336 *Clin Nutr* **65**, 626s-642s.
- 337 26. Norwegian University of Science and Technology (2020) Participation numbers in the HUNT  
338 studies. <https://www.ntnu.edu/hunt/participation> (accessed August 2023).
- 339 27. Statistics Norway (2003) Norwegian Standard Classification of Education, revised 2000.  
340 [https://www.ssb.no/a/english/publikasjoner/pdf/nos\\_c751\\_en/nos\\_c751\\_en.pdf](https://www.ssb.no/a/english/publikasjoner/pdf/nos_c751_en/nos_c751_en.pdf) (accessed August  
341 2023)
- 342 28. Freedman LS, Commins JM, Moler JE *et al.* (2015) Pooled results from 5 validation studies of  
343 dietary self-report instruments using recovery biomarkers for potassium and sodium intake. *Am J*  
344 *Epidemiol* **181**, 473-487.
- 345 29. McLean RM, Farmer VL, Nettleton A *et al.* (2017) Assessment of dietary sodium intake using a  
346 food frequency questionnaire and 24-hour urinary sodium excretion: a systematic literature review. *J*  
347 *Clin Hypertens (Greenwich)* **19**, 1214-1230.
- 348 30. McLean R, Cameron C, Butcher E *et al.* (2019) Comparison of 24-hour urine and 24-hour diet recall  
349 for estimating dietary sodium intake in populations: A systematic review and meta-analysis. *J Clin*  
350 *Hypertens (Greenwich)* **21**, 1753-1762.
- 351 31. Cogswell ME, Wang CY, Chen TC *et al.* (2013) Validity of predictive equations for 24-h urinary  
352 sodium excretion in adults aged 18-39 y. *Am J Clin Nutr* **98**, 1502-1513.
- 353 32. Allen NB, Zhao L, Loria CM *et al.* (2017) The Validity of Predictive Equations to Estimate 24-Hour  
354 Sodium Excretion: The MESA and CARDIA Urinary Sodium Study. *Am J Epidemiol* **186**, 149-159.
- 355 33. Bugge AB (2011) Lovin' It? A Study of Youth and the Culture of Fast Food. *Food, Culture &*  
356 *Society* **14**, 71-89.
- 357 34. Abel MH & Totland TH (2021) *Self reported dietary habits and body weight in adults in Norway -*  
358 *Results from the National Public Health Survey 2020*. Oslo: Norwegian Institute of Public Health.
- 359 35. Iwahori T, Miura K Ueshima H (2017) Time to Consider Use of the Sodium-to-Potassium Ratio for  
360 Practical Sodium Reduction and Potassium Increase. *Nutrients* **9**, 700.
- 361 36. Yatabe MS, Iwahori T, Watanabe A *et al.* (2017) Urinary Sodium-to-Potassium Ratio Tracks the  
362 Changes in Salt Intake during an Experimental Feeding Study Using Standardized Low-Salt and  
363 High-Salt Meals among Healthy Japanese Volunteers. *Nutrients* **9**, 951.
- 364 37. Iwahori T, Miura K, Ueshima H *et al.* (2019) Urinary sodium-to-potassium ratio and intake of  
365 sodium and potassium among men and women from multiethnic general populations: the  
366 INTERSALT Study. *Hypertens Res* **42**, 1590-1598.
- 367 38. Stamler J, Rose G, Stamler R *et al.* (1989) INTERSALT study findings. Public health and medical  
368 care implications. *Hypertension* **14**, 570-577.
- 369 39. Cook NR, Obarzanek E, Cutler JA *et al.* (2009) Joint effects of sodium and potassium intake on  
370 subsequent cardiovascular disease: the Trials of Hypertension Prevention follow-up study. *Arch*  
371 *Intern Med* **169**, 32-40.
- 372 40. Adler AJ, Taylor F, Martin N *et al.* (2014) Reduced dietary salt for the prevention of cardiovascular  
373 disease. *Cochrane Database Syst Rev* **2014**, Cd009217.
- 374 41. Norwegian Directorate of Health (2014) *Action plan salt 2014-18. Reduction of salt intake in the*  
375 *population*. Oslo: Norwegian Directorate of Health.
- 376 42. Jula A (2023) Sodium. In *Nordic Nutrition Recommendations 2023*. Nordic Council of Ministers.
- 377 43. Norwegian Directorate of Health (2019) *The Salt Partnership 2015-2018. Progress and*  
378 *achievements*. no. IS-2838. Oslo: Norwegian Directorate of Health.
- 379 44. (2017) Worldwide trends in blood pressure from 1975 to 2015: a pooled analysis of 1479  
380 population-based measurement studies with 19.1 million participants. *Lancet* **389**, 37-55.

381

382

383

384 **Tables**

385

386 **Table 1. Characteristics of men and women aged 25-64 years with spot urine samples in the**  
 387 **HUNT Study: HUNT3 (2006-08, n=499) and the HUNT4 (2017-19, n=500). Mean (standard**  
 388 **deviation)**

|                          | Men          |              | P value† | Women       |             | P value† |
|--------------------------|--------------|--------------|----------|-------------|-------------|----------|
|                          | HUNT3        | HUNT4        |          | HUNT3       | HUNT4       |          |
| Age                      | 46.8 (10.9)  | 45.8 (12.0)  | 0.33     | 46.1 (10.8) | 45.6 (11.9) | 0.63     |
| BMI                      | 27.8 (3.9)   | 27.6 (4.4)   | 0.55     | 25.9 (4.6)  | 26.7 (5.2)  | 0.086    |
| Na (mmol/l)              | 122.1 (54.0) | 118.5 (52.5) | 0.45     | 94.7 (56.5) | 93.4 (57.0) | 0.80     |
| K (mmol/l)               | 68.3 (31.4)  | 74.3 (37.4)  | 0.054    | 59.1 (32.3) | 62.7 (36.5) | 0.24     |
| Na/K ratio               | 2.08 (1.18)  | 1.92 (1.11)  | 0.1813   | 1.83 (1.02) | 1.77 (1.21) | 0.53     |
| Creatinine               | 12.0 (6.7)   | 11.9 (6.3)   | 0.87     | 8.9 (5.9)   | 8.9 (6.5)   | 0.87     |
| Calculated NaCl (g/24h)* | 11.05 (1.90) | 10.85 (1.86) | 0.25     | 7.69 (1.29) | 7.71 (1.35) | 0.88     |

389

390 BMI, body mass index. Na, urinary sodium concentration. K, urinary potassium concentration. Na/K ratio, ratio of urinary sodium to  
 391 potassium concentrations. NaCl, salt.

392 \* Estimated using the INTERSALT equation with sex-specific coefficients for the Northern European region <sup>(20)</sup>

393 † Independent samples T test for mean difference between HUNT3 and HUNT4 within sex

394

395

396 **Table 2. Spot urinary sodium (Na), potassium (K), sodium to potassium ratio (Na/K ratio),**  
 397 **creatinine and estimated 24-hour salt intake by age groups in men and women participating**  
 398 **in HUNT4 (n=750). Mean (standard deviation)**

|              | N   | Na (mmol/l)      | K (mmol/l)  | Na/K ratio       | Calculated NaCl (g/24h)† | Creatinine (mmol/l) |
|--------------|-----|------------------|-------------|------------------|--------------------------|---------------------|
| <b>Men</b>   |     |                  |             |                  |                          |                     |
| 25-44 years  | 125 | 124.1 (55.0)     | 69.9 (38.3) | 2.17 (1.17)      | 10.7 (2.0)               | 12.1 (6.8)          |
| 45-64 years  | 125 | 113.0 (49.5)     | 78.7 (36.0) | 1.67 (0.98)      | 11.0 (1.8)               | 11.7 (5.7)          |
| 70-79 years  | 125 | 105.9 (44.8)     | 71.4 (30.6) | 1.70 (0.91)      | 11.1 (1.9)               | 11.1 (5.3)          |
| p-value*     |     | <b>0.015</b>     | 0.11        | <b>&lt;0.001</b> | 0.24                     | 0.42                |
| <b>Women</b> |     |                  |             |                  |                          |                     |
| 25-44 years  | 125 | 110.0 (63.2)     | 63.4 (34.1) | 2.03 (1.41)      | 8.1 (1.4)                | 10.2 (7.1)          |
| 45-64 years  | 125 | 77.2 (44.7)      | 62.1 (38.9) | 1.51 (0.91)      | 7.4 (1.2)                | 7.7 (5.6)           |
| 70-79 years‡ | 125 | 85.9 (42.9)      | 63.2 (31.0) | 1.57 (0.86)      | 5.9 (1.4)                | 8.3 (5.5)           |
| p-value*     |     | <b>&lt;0.001</b> | 0.95        | <b>0.001</b>     | <b>&lt;0.001</b>         | <b>0.003</b>        |

399

400 Na, urinary sodium concentration. K, urinary potassium concentration. Na/K ratio, ratio of urinary sodium to potassium  
 401 concentrations. NaCl, salt.

402 \* Difference between age groups tested with analysis of variance (ANOVA)

403 † Estimated using the INTERSALT equation with sex-specific coefficients for the Northern European region <sup>(20)</sup>

404 ‡ Three women aged 70-79 years had missing values for BMI and thereby calculated NaCl

405 P-values <0.05 bolded.

406

407 **Table 3. Age-standardized mean urinary sodium (Na), potassium (K), sodium to potassium**  
 408 **ratio (Na/K ratio) and estimated 24-hour salt intake by educational attainment in men and**  
 409 **women aged 25-64 years participating in HUNT4.**

| Education level*         | N   | Na<br>(mmol/l) | K<br>(mmol/l) | Na/K<br>ratio | Calculated<br>NaCl<br>(g/24-hour) † |
|--------------------------|-----|----------------|---------------|---------------|-------------------------------------|
| <b>Men</b>               |     |                |               |               |                                     |
| Primary                  | 38  | 125.2          | 72.7          | 2.19          | 11.1                                |
| Secondary                | 110 | 122.4          | 75.7          | 2.04          | 10.9                                |
| Tertiary, short (<4 yrs) | 59  | 115.6          | 79.9          | 1.66          | 10.6                                |
| Tertiary, long (≥4 yrs)  | 42  | 108.0          | 65.2          | 1.74          | 10.9                                |
| p-value‡                 |     | 0.38           | 0.26          | <b>0.045</b>  | 0.52                                |
| <b>Women</b>             |     |                |               |               |                                     |
| Primary                  | 39  | 102.4          | 67.9          | 1.65          | 7.7                                 |
| Secondary                | 67  | 98.8           | 59.4          | 2.00          | 8.0                                 |
| Tertiary, short (<4 yrs) | 72  | 82.2           | 63.4          | 1.59          | 7.5                                 |
| Tertiary, long (≥4 yrs)  | 71  | 95.3           | 62.7          | 1.80          | 7.6                                 |
| p-value‡                 |     | 0.19           | 0.73          | 0.20          | 0.23                                |

410

411 Na, urinary sodium concentration. K, urinary potassium concentration. Na/K ratio, ratio of urinary sodium to potassium  
 412 concentrations. NaCl, salt.

413 \* Attained educational level in four categories: Primary education: Completed primary school or 1-2 years of high school/vocational  
 414 school; secondary education: Completed high school or certificate of apprenticeship; tertiary short: University or other post-  
 415 secondary education less than 4 years; tertiary long: University/college education of 4 years or more.

416 † Estimated using the INTERSALT equation with sex-specific coefficients for the Northern European region <sup>(20)</sup>

417 ‡ P-values obtained by linear regression followed by the *testparm* option.

418 P-values <0.05 bolded.
